# Supplementary material
Source: PubMed Central journal article supplement (PMC6488422)
Supplement: NIHMS999790-supplement-Supp_info.pdf [file NIHMS999790-supplement-Supp_info.pdf]

## SUPPORTING INFORMATION

**Supplemental Table 1: Clinical characteristics of human subjects**

|                                         | <b>Allergic</b>   | <b>Non-allergic</b> |
|-----------------------------------------|-------------------|---------------------|
| Total mass cytometry samples            | 19                | 20                  |
| Male (%)                                | 10 (53)           | 10 (50)             |
| Female (%)                              | 9 (47)            | 10 (50)             |
| Total cell culture samples              | 14                | 10                  |
| Male (%)                                | 10 (71)           | 6 (60)              |
| Female (%)                              | 4 (29)            | 4 (40)              |
| Age (mean $\pm$ SEM)                    | 59.8 $\pm$ 2.4    | 43.2 $\pm$ 2.7      |
| Sensitized to peanut (%)                | 0                 | 0                   |
| Total IgE (kU/L) (mean $\pm$ SEM)       | 361.4 $\pm$ 128.2 | 66.6 $\pm$ 17.2     |
| Alpha-gal sIgE (kUA/L) (mean $\pm$ SEM) | 69.8 $\pm$ 42.3   | 0.58 $\pm$ 0.25     |

**Supplemental Table 2: Mass cytometry staining panel**

| <b>Antibody</b> | <b>Surface Molecule</b>     | <b>Clone</b> | <b>Manufacturer</b> | <b>Label</b> | <b>Dilution</b> |
|-----------------|-----------------------------|--------------|---------------------|--------------|-----------------|
| CD3             | CD3                         | UCHT1        | DVS Sciences        | 170 Er       | 200             |
| CD4             | CD4                         | SK3          | DVS Sciences        | 174 Yb       | 200             |
| CD8             | CD8                         | SK1          | DVS Sciences        | 168 Er       | 200             |
| CD14            | CD14                        | M5E2         | DVS Sciences        | 151 Eu       | 100             |
| CD16            | FcyRIII                     | 3G8          | DVS Sciences        | 148 Nd       | 100             |
| CD20            | B lymphocyte antigen        | 2H7          | DVS Sciences        | 147 Sm       | 200             |
| CD24            | Heat stable antigen         | ML4          | DVS Sciences        | 169 Tm       | 100             |
| CD27            | CD27                        | L128         | DVS Sciences        | 158 Gd       | 100             |
| CD38            | cyclic ADP ribose hydrolase | HIT2         | DVS Sciences        | 167 Er       | 100             |
| CD43            | Leukosialin                 | 84-3C1       | DVS Sciences        | 150 Nd       | 100             |
| CD56            | NCAM                        | CM33B        | DVS Sciences        | 176 Yb       | 100             |
| CD86            | B7-2                        | IT2.2        | DVS Sciences        | 156 GDd      | 100             |
| CD127           | IL7R- $\alpha$              | AO19D5       | DVS Sciences        | 165Ho        | 100             |
| CD138           | Syndecan 1                  | DL-101       | DVS Sciences        | 145 Nd       | 100             |
| CD184           | CXCR4                       | 12G5         | DVS Sciences        | 175 Lu       | 100             |
| CD185           | CXCR5                       | 51505        | DVS Sciences        | 171 Yb       | 100             |
| CD196           | CCR6                        | G034E3       | DVS Sciences        | 141 Pr       | 100             |
| HLA-DR          | HLA-DR                      | L243         | DVS Sciences        | 143 Nd       | 100             |
| IgD             | IgD                         | IA6-2        | DVS Sciences        | 146 Nd       | 100             |
| IgM             | IgM                         | MHM-88       | DVS Sciences        | 172 Yb       | 100             |
| CD45            | PTPRC                       | HI30         | DVS Sciences        | 154 Sm       | 400             |
| CD25            | IL2R- $\alpha$ chain        | 2A3          | DVS Sciences        | 149 Sm       | 100             |
| CD11b           | ITGAM                       | ICRF44       | DVS Sciences        | 144Nd        | 100             |

**Supplemental Table 3: Flow cytometry staining panel**

| <b>Antibody</b> | <b>Clone</b> | <b>Manufacturer</b> | <b>Label</b>    | <b>Dilution</b> |
|-----------------|--------------|---------------------|-----------------|-----------------|
| CD20            | 2H7          | BioLegend           | FITC            | 100             |
| CXCR4           | 12G5         | eBioscience         | PE              | 50              |
| CD43            | HIT-3A       | BioLegend           | APC             | 50              |
| CXCR5           | MU5UBEE      | eBioscience         | PECy7           | 50              |
| CD24            | ML5          | BioLegend           | PerCPCy5.5      | 50              |
| CD38            | HIT2         | Invitrogen          | PE-Texas<br>Red | 50              |
| IgD             | IA6-2        | BioLegend           | APCCy7          | 100             |
| IgM             | SA-DA4       | eBioscience         | Biotin          | 100             |
| HLA-DR          | L243         | BioLegend           | BV510           | 20              |
| CD25            | BC96         | BioLegend           | BV711           | 20              |
| Streptavidin    | --           | eBioscience         | EF450           | 200             |
| live/dead       | --           | Invitrogen          | Aqua            | 200             |

## Cox et al. Supplemental Figure 1

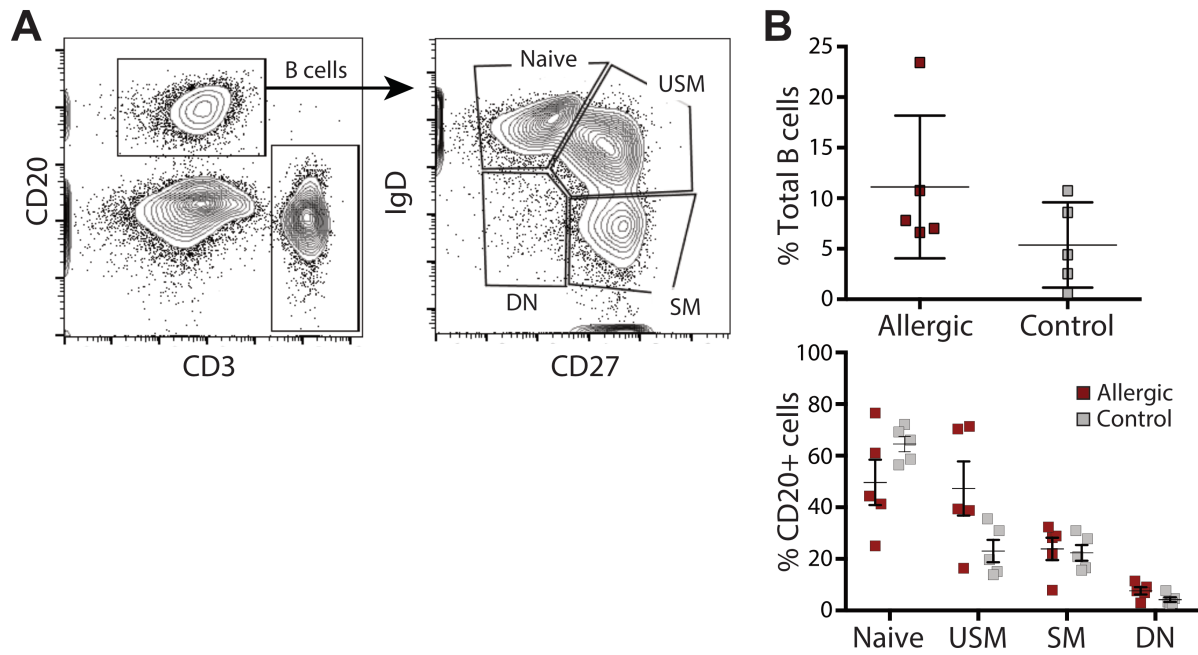

**Supplemental Figure 1. Distribution of major B cell populations assessed by flow cytometry.** (A and B) Mature B cells were measured by fluorescent flow cytometry. Bar plots represent mean  $\pm$  SD of the indicated cell population ( $n = 5$  in each group), which were not statistically significant between groups. USM, immunoglobulin-unswitched memory B cells; SM, switched memory B cells; DN, IgD<sup>-</sup> CD27<sup>-</sup> double negative B cells.

## Cox et al. Supplemental Figure 2

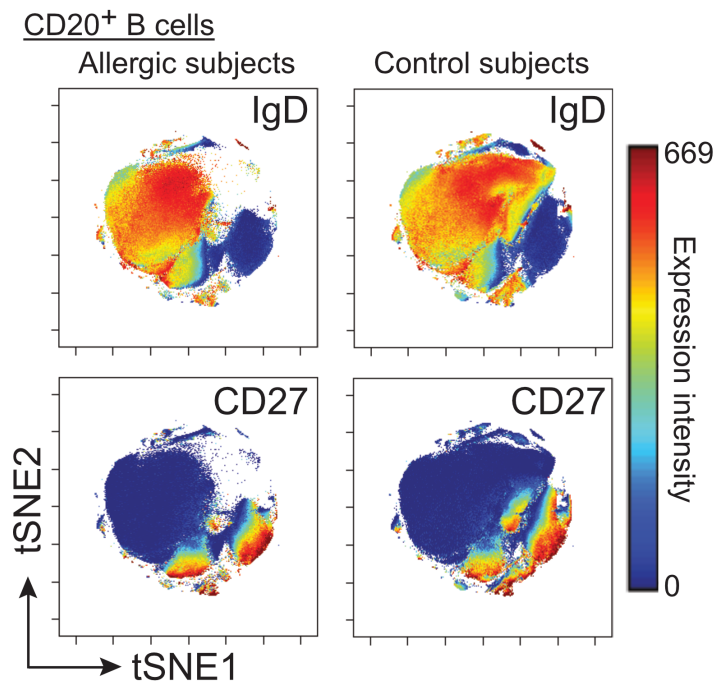

**Supplemental Figure 2. viSNE maps of CD20<sup>+</sup> B cells from datasets of meat allergic and control subjects.** viSNE maps of B cells gated on live, singlet, CD20<sup>+</sup>CD3<sup>-</sup> cells from concatenated datasets from meat allergic (n = 19) and non-meat allergic (n = 20) control subjects. Plots are colored by IgD and CD27 expression levels.

# Cox et al. Supplemental Figure 3

Healthy Control Subjects

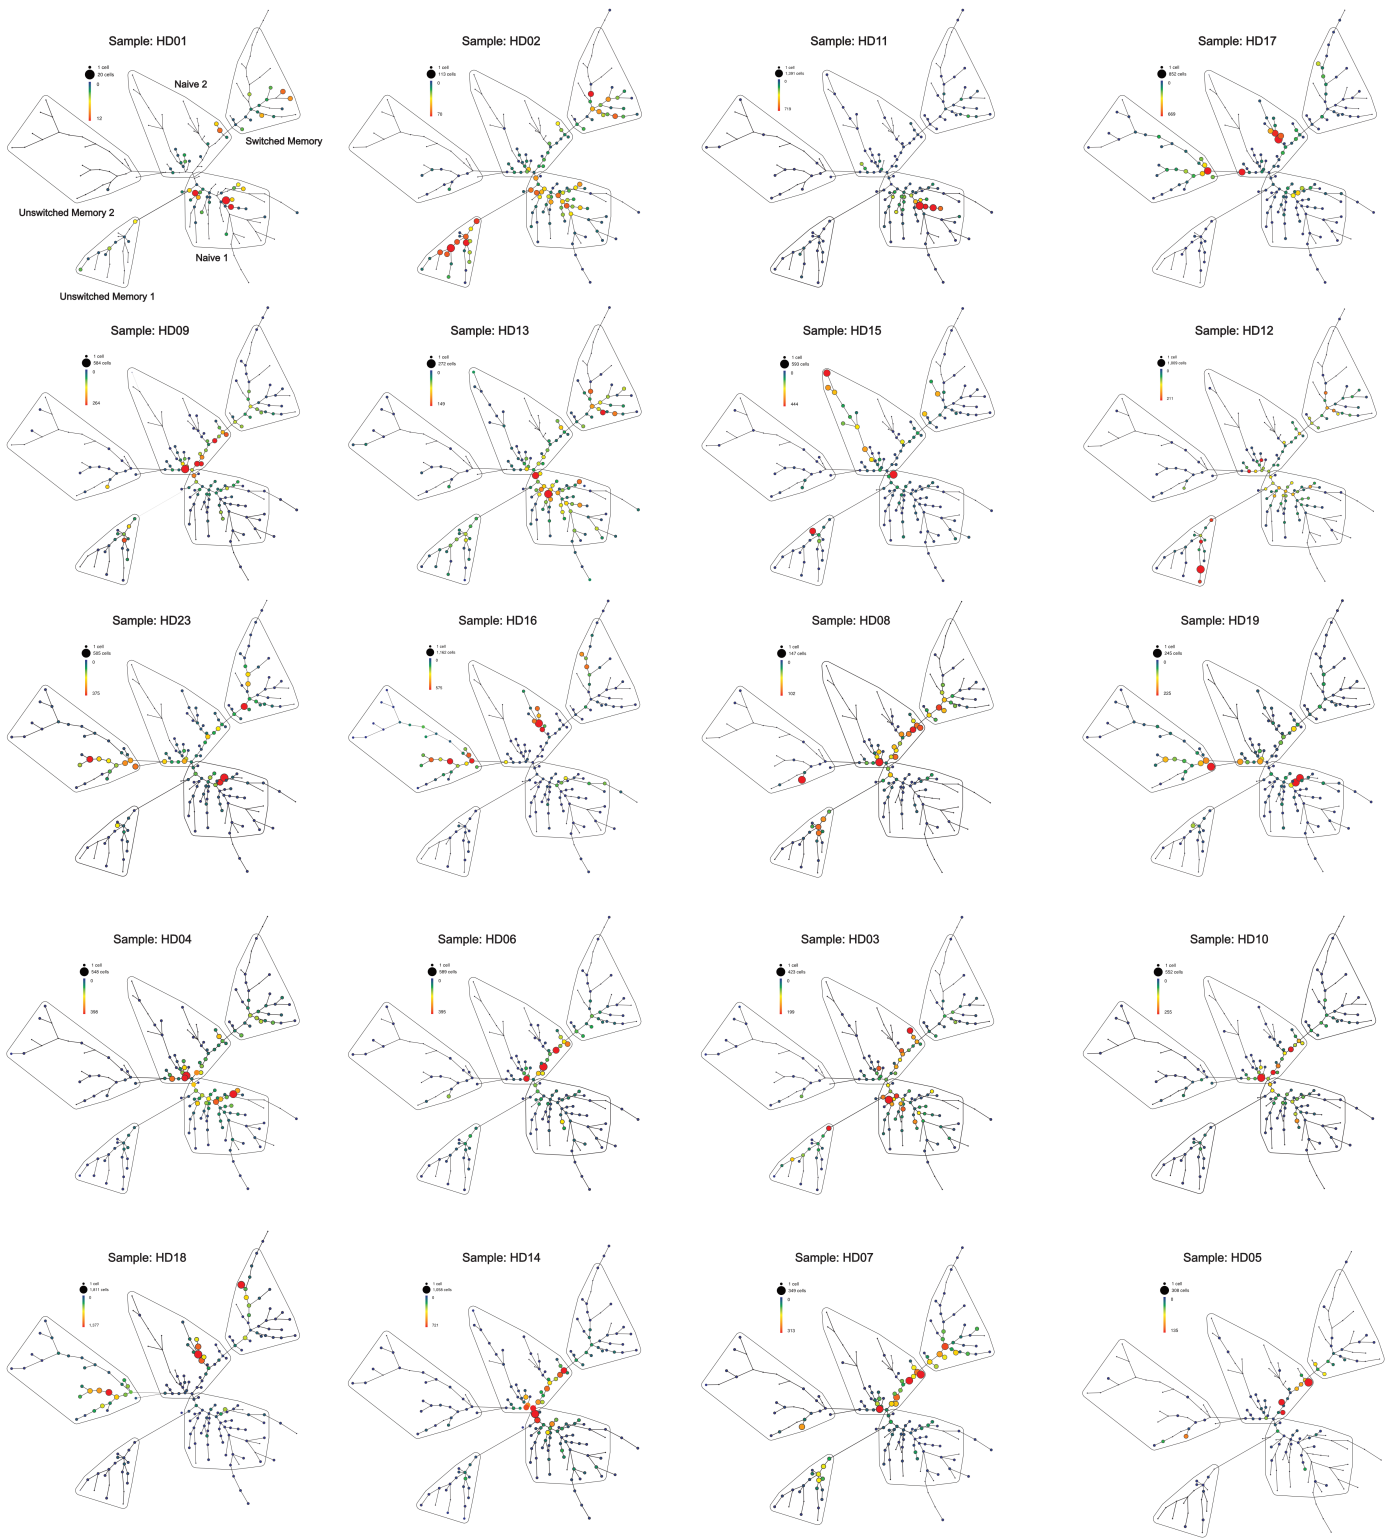

## Cox et al. Supplemental Figure 3 continued

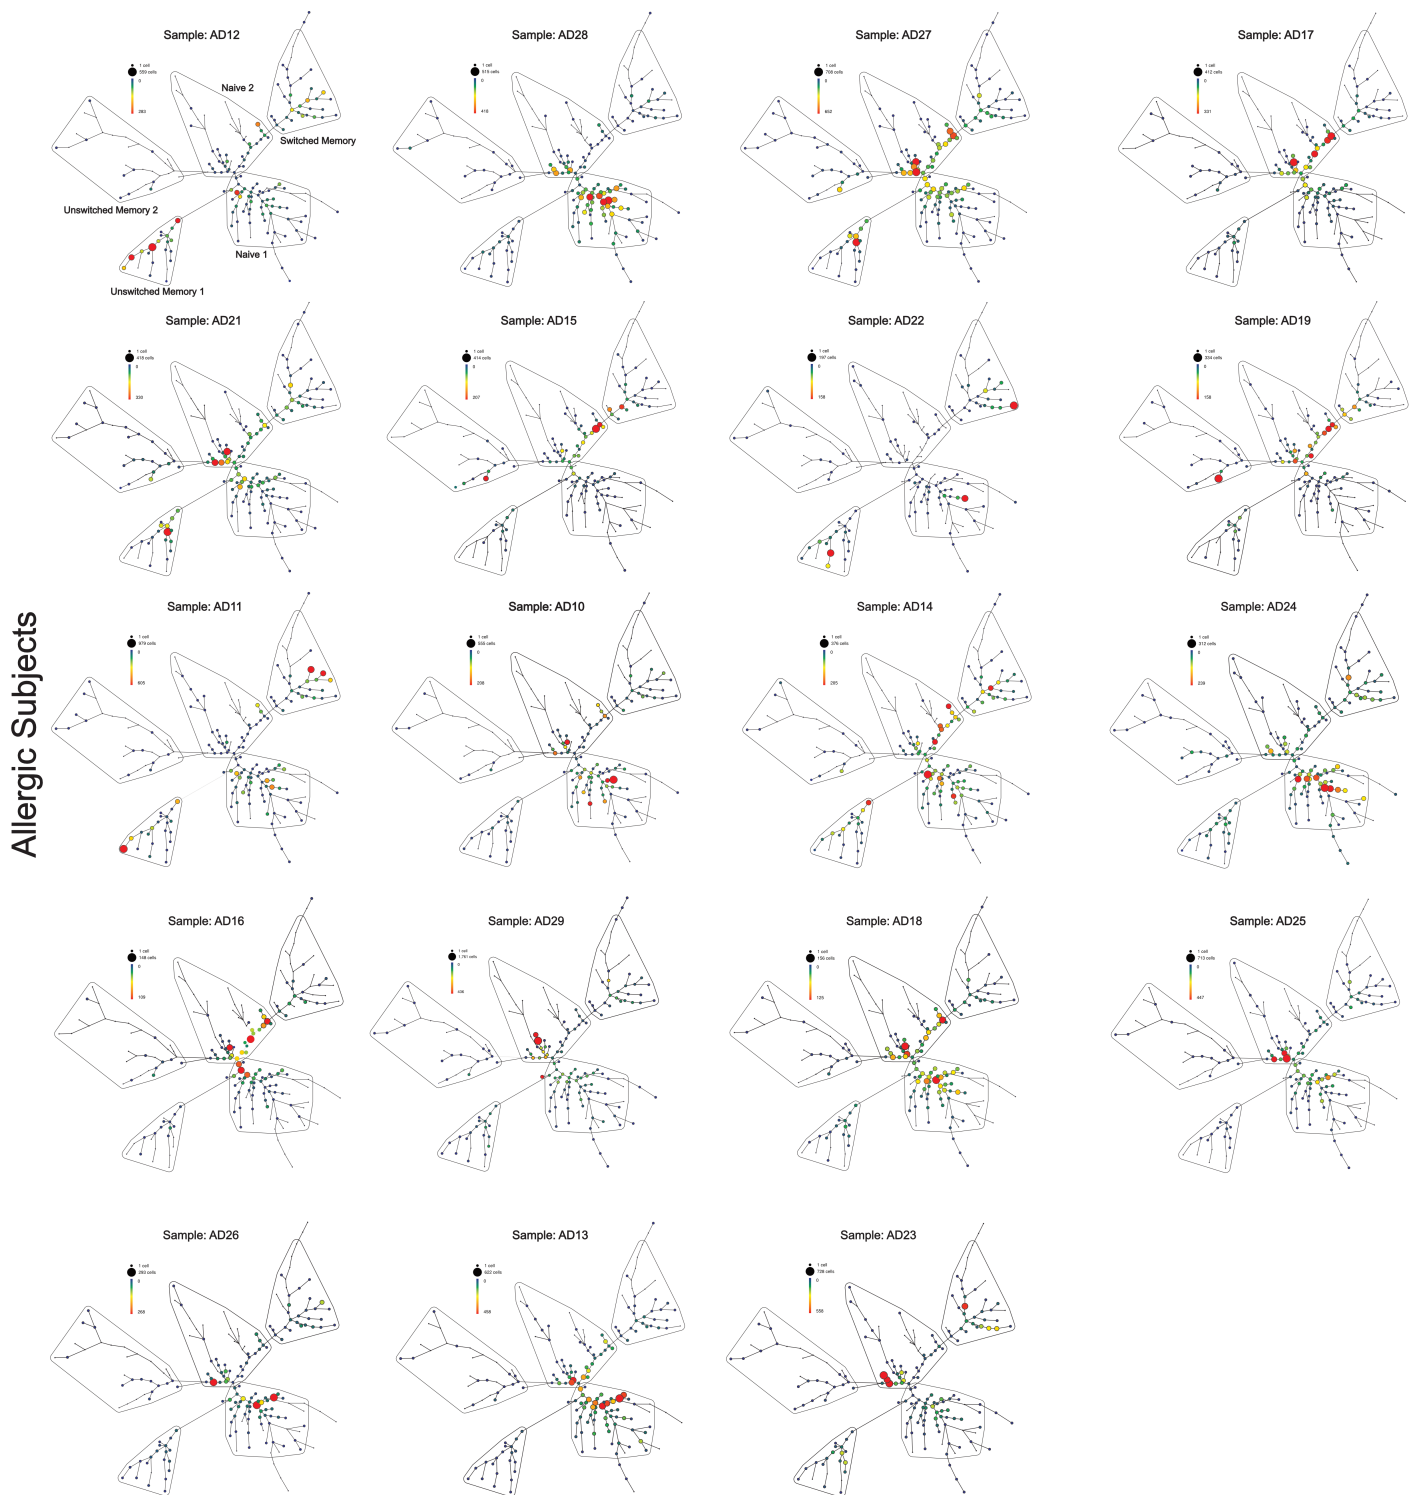

**Supplemental Figure 3. SPADE analysis of CyTOF data shows phenotypic changes of B cells in meat allergic subjects. SPADE analysis of individual datasets of each subject group is shown. Each circular node represents a phenotypically similar population of B cells, with the relationship between nodes**

reflecting the most similar phenotypes to adjacent nodes. Node size and color represent the number of cells. Manual gating on the basis of IgD and CD27 expression was used to annotate known B cell subsets: Naïve, (CD27<sup>-</sup> IgD<sup>+</sup>), Unswitched memory (CD27<sup>+</sup> IgD<sup>+</sup>) and Switched memory (CD27<sup>+</sup> IgD<sup>-</sup>).



## Cox et al. Supplemental Figure 4

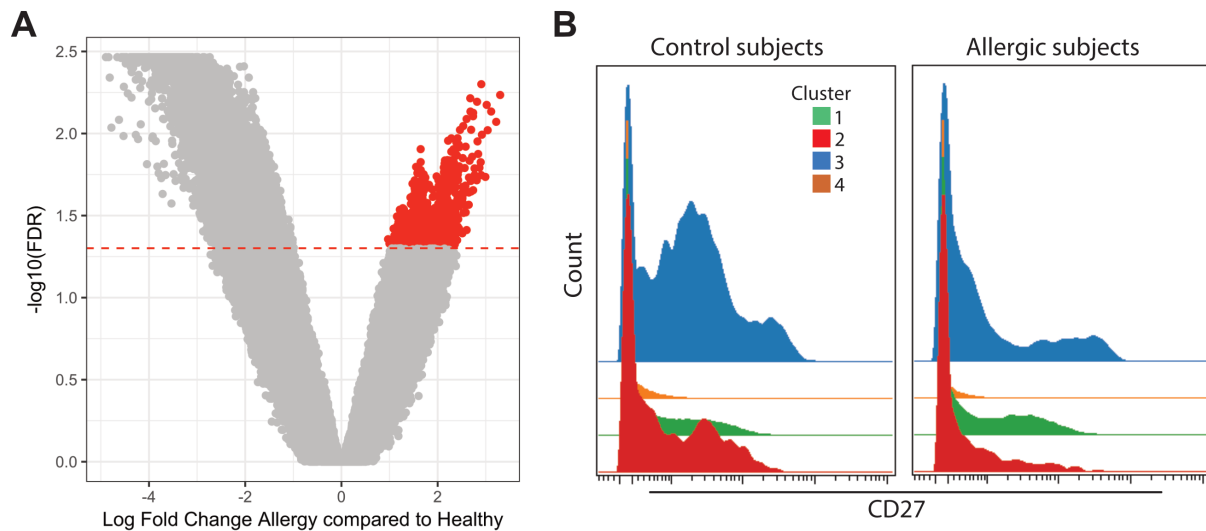

### Supplemental Figure 4. Assessment of changes in B cell subsets between

#### allergic and control subjects. (A) Volcano plot of differentially abundant B cell

immunophenotypes between 19 meat allergic subjects and 20 non-allergic controls, with negative  $\log_{10}$ -scaled FDR-corrected P-values on the Y-axis, and the  $\log_2$  fold change on the X-axis. B cell immunophenotypes to the right and colored in red were comparatively found at higher frequencies in allergic patients. The horizontal red line indicates a significance of 0.05 after adjustment of FDR using the Benjamini-Hochberg method. Grey dots below the red line represent no changes in the frequencies of B cell immunophenotypes. B cell immunophenotypes to the left and colored in grey and above the red line were found at significantly higher frequencies in controls. (B) Histograms showing CD27 expression levels on the indicated B cell clusters measured by CyTOF.
